# Supplementary material
Source: PubMed Central journal article supplement (PMC2574831)

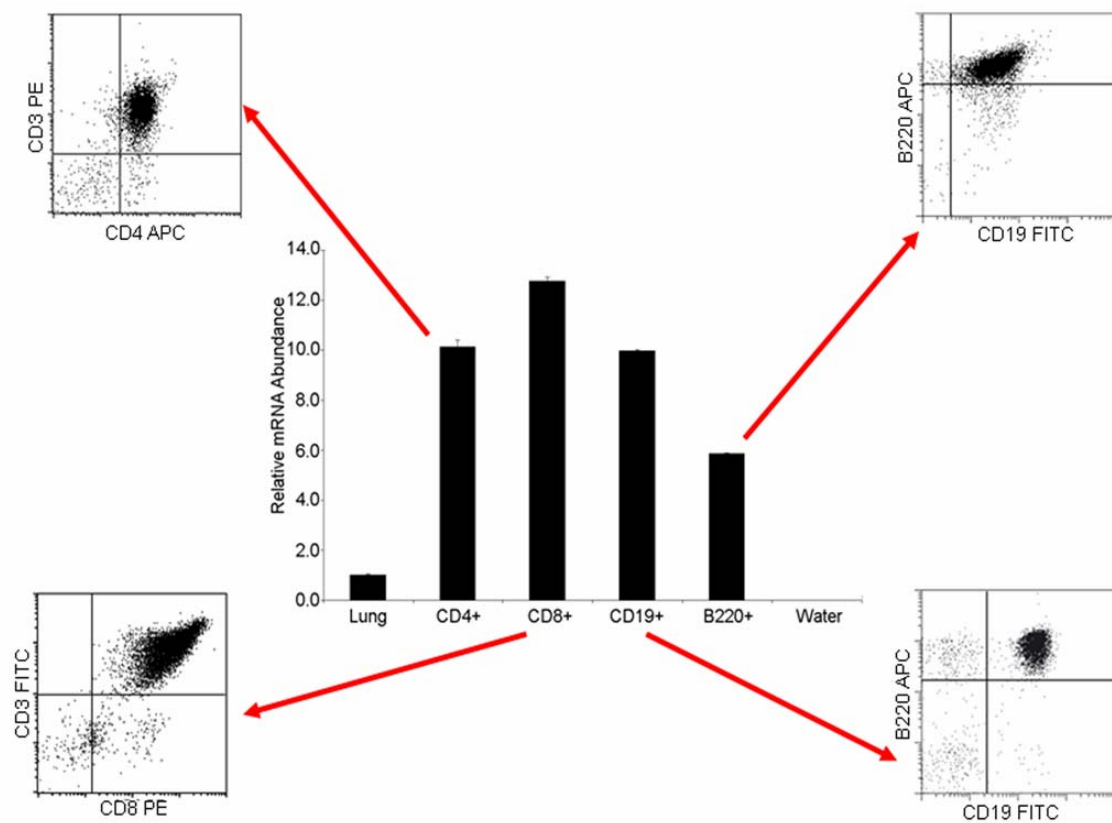

Supplement: NIHMS55589-supplement-supplement_1.pdf [file NIHMS55589-supplement-supplement_1.pdf]
